# Supplementary figures and images for: Composite fibers prepared from multi-walled carbon nanotubes/cellulose dispersed/dissolved in ammonium/dimethyl sulfoxide mixed solvent
Source: Royal Society of Chemistry journal article supplement (doi:10.1039/c6ra25318k), 2017-01-01

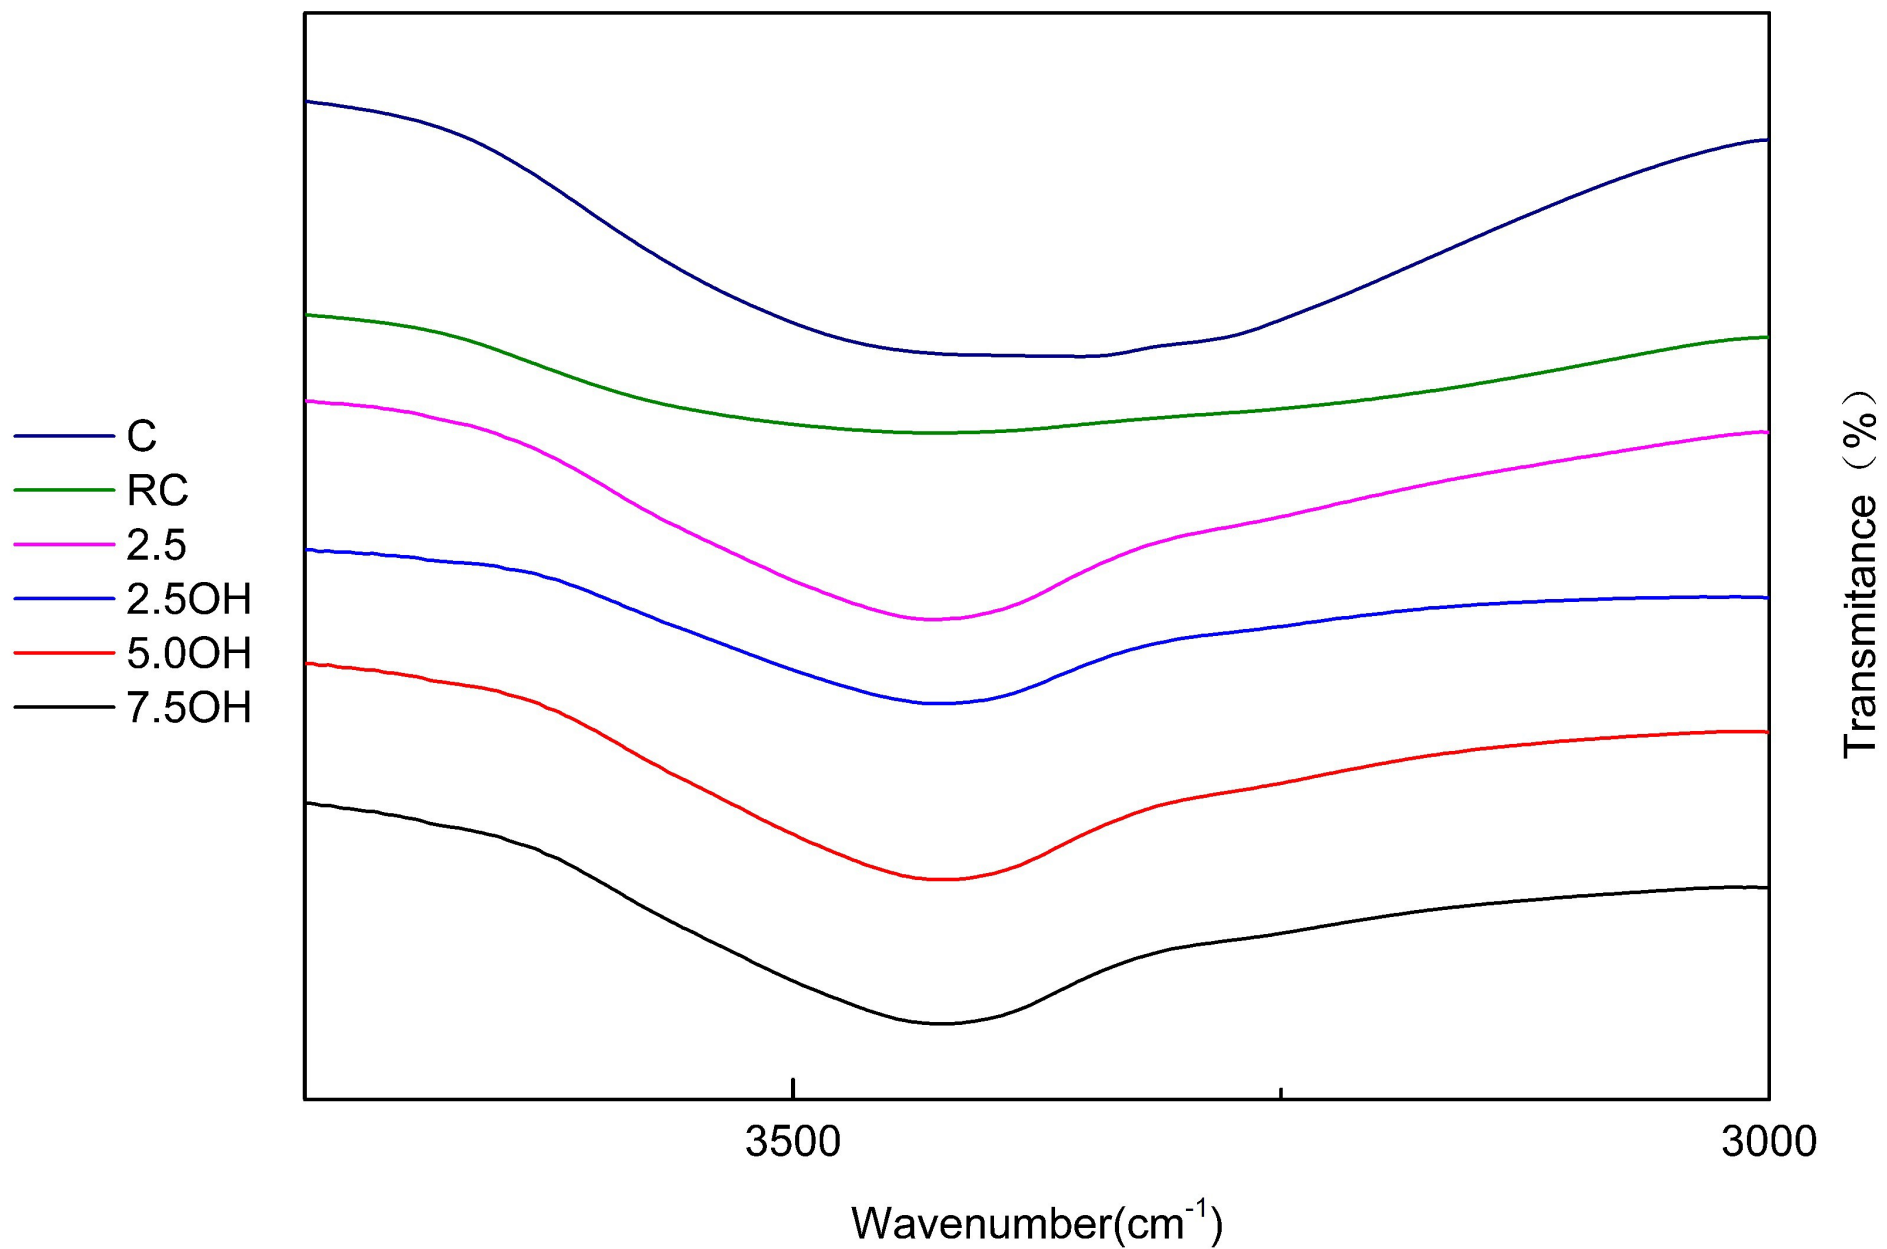

Supplement: c6ra25318k1.pdf [file c6ra25318k1.pdf]
